# Supplementary material
Source: Springer Nature journal article supplement (https://www.springermedizin.de/resource/supplementary/13046_2011_531_MOESM7_ESM.pdf/9662212)
Supplement: MOESM7 [file 9662212]

|            |                                           |        |
|------------|-------------------------------------------|--------|
| NS group   | Subcutaneous injection of normal saline   |        |
| cFA group  | Intragastric administration of folic acid |        |
| DMH1 group | DMH                                       |        |
| DMH group  | DMH                                       |        |
| FA1 group  | DMH+FA                                    |        |
| FA2 group  | DMH                                       | DMH+FA |
| FA3 group  | DMH+FA                                    |        |

0
12 week
24 week
